# Supplementary material for: Associations of Non-Alcoholic Beverages with Major Depressive Disorder History and Depressive Symptoms Clusters in a Sample of Overweight Adults
Source: PubMed Central journal article supplement (PMC7589496; doi:10.3390/nu12103202), 2020-10-20
Supplement: nutrients-12-03202-s001.pdf [file nutrients-12-03202-s001.pdf]

**Table S1.** IDS30-SR items included in the three symptom clusters.

| <b>Mood subscale</b>                          | <b>Cognitive subscale</b>              | <b>Somatic subscale</b>                            |
|-----------------------------------------------|----------------------------------------|----------------------------------------------------|
| Diminished capacity for pleasure or enjoyment | Concentration/decision-making problems | Aches and pains                                    |
| Diminished interest in people/activities      | Future pessimism                       | Appetite increase                                  |
| Diminished quality of mood                    | Self-criticism and blame               | Appetite decrease                                  |
| Diminished reactivity of mood                 | Suicidal thoughts                      | Constipation/ diarrhea                             |
| Feeling anxious or tense                      |                                        | Diurnal variation with a worse mood in the morning |
| Feeling irritable                             |                                        | Early morning awakening                            |
| Feeling sad                                   |                                        | Low energy level/fatigability                      |
| Interpersonal sensitivity                     |                                        | Other bodily symptoms                              |
| Leadens paralysis                             |                                        | Problems falling asleep                            |
| Panic/phobic symptoms                         |                                        | Problems sleeping during the night                 |
|                                               |                                        | Psychomotor agitation                              |
|                                               |                                        | Psychomotor retardation                            |
|                                               |                                        | Reduced interest in sex                            |
|                                               |                                        | Sleeping too much                                  |
|                                               |                                        | Weight increase                                    |
|                                               |                                        | Weight decrease                                    |

**Table S2** Baseline characteristics of the 941 included participants per country.

|                                        | <b>Germany<br/>(n = 275)</b> | <b>United Kingdom<br/>(n = 227)</b> | <b>Spain<br/>(n = 215)</b> | <b>The Netherlands<br/>(n = 224)</b> | <b>p value</b> |
|----------------------------------------|------------------------------|-------------------------------------|----------------------------|--------------------------------------|----------------|
| Demographics                           |                              |                                     |                            |                                      |                |
| Age, Mean, (SD)                        | 43.47 (13.76)                | 50.45 (12.47)                       | 43.34 (12.04)              | 50.38 (11.15)                        | <0.01          |
| Sex, n (% female)                      | 208 (75.6%)                  | 181 (79.7%)                         | 149 (69.3%)                | 171 (76.3%)                          | 0.082          |
| Level of education                     |                              |                                     |                            |                                      |                |
| Lower education, n (%)                 | 9 (3.3%)                     | 9 (4.0%)                            | 45 (20.9%)                 | 28 (12.5%)                           | <0.01          |
| Middle education, n (%)                | 185 (67.3%)                  | 103 (45.4%)                         | 90 (41.9%)                 | 75 (33.5%)                           | <0.01          |
| Higher education n (%)                 | 81 (29.5%)                   | 115 (50.7%)                         | 80 (37.2%)                 | 121 (54.0%)                          | <0.01          |
| Lifestyle                              |                              |                                     |                            |                                      |                |
| BMI, Mean (SD)                         | 31.13 (3.85)                 | 30.64 (3.67)                        | 32.20 (4.03)               | 31.38 (4.12)                         | < 0.01         |
| Smoking, n (% yes)                     | 63 (22.9%)                   | 24 (10.6%)                          | 44 (20.5%)                 | 34 (15.2%)                           | < 0.01         |
| Alcohol use, Mean (SD)                 | 3.46 (3.00)                  | 5.40 (4.64)                         | 2.70 (2.48)                | 3.98 (3.73)                          | < 0.01         |
| Physical activity, Mean (SD)           | 3.05 (2.21)                  | 4.22 (2.11)                         | 3.29 (2.57)                | 4.00 (2.30)                          | < 0.01         |
| Medical comorbidities                  |                              |                                     |                            |                                      |                |
| High Blood pressure, n (% yes)         | 92 (33.5%)                   | 49 (21.6%)                          | 65 (30.2%)                 | 84 (37.5%)                           | < 0.01         |
| Diabetes, n (% yes)                    | 19 (6.9%)                    | 11 (4.8%)                           | 13 (6.0%)                  | 6 (2.7%)                             | 0.081          |
| Stomach or intestinal ulcer, n (% yes) | 10 (3.6%)                    | 9 (4.0%)                            | 9 (4.2%)                   | 9 (4.0%)                             | 0.991          |

|                                                  |              |              |               |              |        |
|--------------------------------------------------|--------------|--------------|---------------|--------------|--------|
| Psychiatric characteristics                      |              |              |               |              |        |
| History of depression, n (% yes)                 | 61 (22.2%)   | 123 (54.2%)  | 56 (26.0%)    | 72 (32.1%)   | < 0.01 |
| Severity of depressive symptoms, Mean (SD)       | 20.18 (9.82) | 22.11 (8.86) | 26.20 (11.03) | 18.99 (8.89) | < 0.01 |
| Mood symptom cluster, Mean (SD)                  | 6.67 (4.64)  | 7.51 (4.34)  | 9.73 (5.24)   | 6.31 (4.50)  | < 0.01 |
| Somatic symptom cluster, Mean (SD)               | 10.81 (5.01) | 11.91 (4.49) | 13.13 (5.17)  | 10.28 (4.31) | < 0.01 |
| Cognitive symptom cluster, Mean (SD)             | 2.71 (1.89)  | 2.70 (1.84)  | 3.33 (2.28)   | 2.40 (1.83)  | < 0.01 |
| Beverages consumption                            |              |              |               |              |        |
| Carbonated/soft drinks with sugar                |              |              |               |              | <0.01  |
| <1/week, n (% yes)                               | 195 (70.9%)  | 197 (86.8%)  | 158 (73.5%)   | 181 (80.8%)  |        |
| 1-6/week, n (% yes)                              | 61 (22.2%)   | 25 (11.0%)   | 44 (20.5%)    | 35 (15.6%)   |        |
| ≥ 1/day, n (% yes)                               | 19 (42.2%)   | 5 (11.1%)    | 13 (28.9%)    | 8 (17.8%)    |        |
| Carbonated/soft drinks with artificial sweetener |              |              |               |              | <0.01  |
| <1/week, n (% yes)                               | 207 (75.3%)  | 147 (64.8%)  | 113 (52.6%)   | 135 (60.5%)  |        |
| 1-6/week, n (% yes)                              | 51 (18.5%)   | 55 (24.2%)   | 76 (35.3%)    | 50 (22.4%)   |        |
| ≥ 1/day, n (% yes)                               | 17 (16%)     | 25 (23.6%)   | 26 (24.5%)    | 38 (35.8%)   |        |
| ≥ 4/day, n (% yes)                               | 7 (2.5%)     | 1 (0.4%)     | 5 (2.3%)      | 7 (3.1%)     |        |
| Coffee                                           |              |              |               |              | <0.01  |
| <1/week, n (% yes)                               | 54 (19.6%)   | 58 (25.6%)   | 34 (15.8%)    | 43 (19.2%)   |        |
| 1-6/week, n (% yes)                              | 31 (11.3%)   | 32 (14.1%)   | 23 (10.7%)    | 15 (6.7%)    |        |
| 1-3/day, n (% yes)                               | 169 (61.5%)  | 113 (49.8%)  | 143 (66.5%)   | 109 (48.7%)  |        |
| ≥ 4/day, n (% yes)                               | 21 (7.6%)    | 24 (10.6%)   | 15 (7.0%)     | 57 (25.4%)   |        |
| Tea                                              |              |              |               |              | <0.01  |
| <1/week, n (% yes)                               | 108 (39.3%)  | 96 (42.3%)   | 128 (59.5%)   | 50 (22.3%)   |        |
| 1-6/week, n (% yes)                              | 103 (37.5%)  | 30 (13.2%)   | 53 (24.7%)    | 59 (26.3%)   |        |
| 1-3/day, n (% yes)                               | 57 (20.7%)   | 66 (29.1%)   | 33 (15.3%)    | 88 (39.3%)   |        |
| ≥ 4/day, n (% yes)                               | 7 (2.5%)     | 35 (15.4%)   | 1 (0.5%)      | 27 (12.1%)   |        |
